# Supplementary material for: Age-Related Changes in Hepatic Lipid Metabolism and Abdominal Adipose Deposition in Yellow-Feathered Broilers Aged from 1 to 56 Days
Source: MDPI journal article supplement (doi:10.3390/ani13243860), 2023-12-15
Supplement: s1 [file s1]

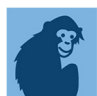**Table S1.** Basal diet composition (as-fed basis)

| Items                       | Day 1 to 28 | Day 29 to 56 |
|-----------------------------|-------------|--------------|
| Ingredients, %              |             |              |
| Corn                        | 61.50       | 65.10        |
| Soybean                     | 28.50       | 23.00        |
| Soybean oil                 | 1.70        | 3.50         |
| Calcium hydrogen phosphate  | 1.93        | 1.65         |
| Shell power                 | 2.22        | 2.67         |
| Salt                        | 0.30        | 0.30         |
| Methionine                  | 0.17        | 0.12         |
| Lysine                      | 0.16        | 0.15         |
| Zeolite powder              | 1.52        | 1.51         |
| Vitamin premix <sup>1</sup> | 1.00        | 1.00         |
| Mineral premix <sup>2</sup> | 1.00        | 1.00         |
| Nutrient level              |             |              |
| Metabolic energy, MJ/kg     | 2.91        | 3.06         |
| Crude protein, %            | 21.00       | 19.00        |
| Crude fat, %                | 2.94        | 3.39         |
| Calcium, %                  | 1.00        | 0.90         |
| Available phosphorous, %    | 0.45        | 0.41         |
| Methionine, %               | 0.45        | 0.36         |
| Lysine, %                   | 1.13        | 0.98         |

<sup>1</sup> Provided per kilogram of complete diet: 12,800IU Vitamin A, 1,600IU Vitamin D<sub>3</sub>, 60IU Vitamin E, 1.6mg Vitamin K<sub>3</sub>, 0.12mg Biotin, 50mg Choline, 1.2mg Folic acid, 32mg Nicotinic acid, 16mg Pantothenic acid, 4.8mg Riboflavin, 2.4mg Thiamine (VB<sub>1</sub>), 3.2mg Vitamin B<sub>6</sub>, and 0.03 mg Vitamin B<sub>12</sub>.

<sup>2</sup> Provided per kilogram of diet: Mg, 79mg as manganese oxide; Zn, 60mg as zinc oxide; Cu 100mg as copper sulfate; Fe, 120mg as iron sulfate; I, 0.96mg as potassium iodine; Co, 0.16mg as cobalt sulfate and Se, 0.24mg as sodium selenite.

**Table S2.** Primers for real-time PCR

| Gene <sup>1</sup> | Accession NO. | Primer sequence (5' to 3')                                | Product size, bp |
|-------------------|---------------|-----------------------------------------------------------|------------------|
| <i>β-actin</i>    | L08165        | F: ATCCGGACCCTCCATTGTC<br>R: AGCCATGCCAATCTCGTCTT         | 113              |
| <i>ChREBP</i>     | EU152408      | F: ATTGACCCGACCCTGACG<br>R: CATACTGGATGTACCACGCTCT        | 160              |
| <i>SREBP-1c</i>   | XM_015294109  | F: GCCCTCTGTGCCTTTGTCTTC<br>R: ACTCAGCCATGATGCTTCTTC      | 130              |
| <i>FAS</i>        | J03860        | F: TTTGGTGGTTCGAGGTGGTA<br>R: CAAAGGTTGTATTTCCGGGAGC      | 215              |
| <i>ACC</i>        | J03541        | F: GCTTCCCATTGCGCTCCTA<br>R: GCCATTCTCACCACCTGATTACTG     | 185              |
| <i>SCD1</i>       | NM_204890     | F: GTTTCACAACACTACCACCATAACATT<br>R: CCATCTCCAGTCCGCATTTT | 175              |
| <i>PPARα</i>      | AF163809      | F: TTAAACGGA GTTCCA ATCGC<br>R: AACCCCTTACAACCTTCACAAGC   | 224              |
| <i>MTTP</i>       | NM_001109784  | F: GCAGATGGACAGAGTTGGCT<br>R: ACACCAAAAAGTGCAAGGTGC       | 224              |
| <i>LPL</i>        | NM_205282     | F: CCGATCCCGAAGCTGAGATG<br>R: ACATTCTGTACCGTCCAC          | 186              |
| <i>CPT1</i>       | AY675193      | F: TAGAGGGCGTGGACCAATAA<br>R: TGGGATGCGGGAGGTATT          | 229              |
| <i>ApoB</i>       | NM_001044633  | F: ATCAGCCAAGCAGAGCTTCC<br>R: GCCGAGCAGTGATACCATGA        | 122              |
| <i>FABP1</i>      | HQ640427.1    | F: GAGCTCCAGTCCCATGAAAA<br>R: TCAGCAGCTCCATCTCACAC        | 120              |
| <i>PPARγ</i>      | NM_001001460  | F: CACTGCAGGAACAGAACAAAGAA<br>R: TCCACAGAGCGAAACTGACATC   | 120              |
| <i>C/EBPα</i>     | NM_001031459  | F: CGCGGCAAATCCAAAAAG<br>R: GGCGCACGCGGTACTC              | 120              |
| <i>C/EBPβ</i>     | NM_205253     | F: GCCGCCCGCCTTTAAA<br>R: CCAAACAGTCCGCCTCGTAA            | 120              |

<sup>1</sup> *ChREBP*, carbohydrate responsive element binding protein, *SREBP-1c*, sterol regulatory element-binding protein 1c; *FAS*, fatty acid synthase; *ACC*, acetyl-coenzyme carboxylase; *SCD*, stearoyl-CoA desaturase; *PPAR*, proliferator-activated regulator; *MTTP*, microsomal triglyceride transfer protein; *LPL*, lipoprotein lipase; *CPT*, carnitine palmitoyl transferase; *ApoB*, Apolipoprotein B; *FABP*, fatty acid binding protein; *C/EBP*, CCAAT/enhancer binding protein.
